# Supplementary material for: DFT calculations in the assignment of solid-state NMR and crystal structure elucidation of a lanthanum(iii) complex with dithiocarbamate and phenanthroline
Source: Royal Society of Chemistry journal article supplement (doi:10.1039/c6dt03705d), 2016-01-01
Supplement: c6dt03705d1.pdf [file c6dt03705d1.pdf]

Electronic Supporting Information (ESI) to the article

## DFT Calculations in the Assignment of Solid-state NMR and Crystal Structure Elucidation of a Lanthanum(III) Complex with Dithiocarbamate and Phenantroline

Vasanth Gowda,<sup>a,b,\*</sup> Risto S. Laitinen,<sup>c</sup> Ville-Veikko Telkki,<sup>a</sup> Anna-Carin Larsson,<sup>b</sup>  
Oleg N. Antzutkin<sup>b</sup> and Perttu Lantto<sup>a,\*</sup>

<sup>a</sup> NMR Research Unit, University of Oulu, P.O. Box 3000, FI-90014 Oulu, Finland.

<sup>b</sup> Chemistry of Interfaces, Luleå University of Technology, SE-97187, Luleå, Sweden.

<sup>c</sup> Laboratory of Inorganic Chemistry, University of Oulu, P.O. Box 3000, FI-90014, Finland.

Email: [gowda.vasanth.k@gmail.com](mailto:gowda.vasanth.k@gmail.com); [perttu.lantto@oulu.fi](mailto:perttu.lantto@oulu.fi)

**Table S1.** Comparison between the experimental solution-state NMR data (600 MHz, CDCl<sub>3</sub>) and ADF/ZORA calculated <sup>1</sup>H and <sup>13</sup>C chemical shifts.

**Table S2.** Selected experimental and CASTEP calculated bond distances.

**Table S3.** Selected experimental and CASTEP calculated bond angles.

**Table S4.** GIPAW/PBE calculated <sup>13</sup>C and <sup>15</sup>N nuclear shielding values.

**Tables S5-S6.** Natural bond order (NBO) analysis at the scalar relativistic (SR) PBE theory level with DZ basis set.

**Table S7.** Natural population analysis (NPA) of the title complex at the SR/PBE/DZ level of theory.

**Table S8.** Cartesian coordinates for the CASTEP/PBE optimised geometry of the title complex.

**Figure S1.** <sup>1</sup>H-NMR spectrum of the title complex (600 MHz, CDCl<sub>3</sub>)

**Figure S2.** <sup>13</sup>C-NMR spectra of the title complex (600 MHz, CDCl<sub>3</sub>)

**Figure S3.** <sup>1</sup>H-<sup>13</sup>C and <sup>1</sup>H-<sup>15</sup>N HMBC NMR spectra (600 MHz, CDCl<sub>3</sub>)

**Figure S4.** Linear regression plots of the experimental *vs.* calculated chemical shifts.

**Figure S5.** Molecular graph of the title complex showing bond and ring critical points according to the QTAIM analysis.

**Figure S6.** Contour plot representations of the Laplacian of the electron density ( $\nabla^2\rho$ ).

**Figure S7.** Visualisation of some selected donor-acceptor NBOs.

**Figure S8.** The appearance of the frontier molecular orbitals in the optimised geometry of the title complex at the DFT B3LYP/TZ2P level of theory.

**Table S1.** Experimental ( $\delta_{expt}$ )<sup>a</sup> and ADF calculated ( $\delta_{calc}$ )<sup>b</sup> NMR <sup>1</sup>H and <sup>13</sup>C chemical shifts and coordination shifts ( $\Delta_{coord}$ )<sup>c</sup> (values within parenthesis) for the title complex (in ppm).

| Label <sup>d</sup>              | $\delta_{calc}$ (complex) | $\delta_{expt}$ (complex) |
|---------------------------------|---------------------------|---------------------------|
| <sup>13</sup> C chemical shifts |                           |                           |
| C13/C18/C23 (Dtc)               | 203.5                     | 206.0                     |
| C1/C12                          | 151.5                     | 151.2 (+0.6) <sup>e</sup> |
| C5/C9                           | 147.6                     | 145.8 (-0.8) <sup>e</sup> |
| C3/C10                          | 136.3                     | 138.3 (+2.1) <sup>e</sup> |
| C4/C8                           | 130.9                     | 129.7 (+0.8) <sup>e</sup> |
| C6/C7                           | 129.9                     | 127.1 (+0.3) <sup>e</sup> |
| C2/C11                          | 125.2                     | 123.8 (+0.5) <sup>e</sup> |
| -CH <sub>2</sub>                | 48.5                      | 46.4                      |
| -CH <sub>3</sub>                | 9.2                       | 12.5                      |
| <sup>1</sup> H chemical shifts  |                           |                           |
| H1/H12                          | 10.8                      | 9.84 (+0.63) <sup>e</sup> |
| H3/H10                          | 8.6                       | 8.38 (+0.11) <sup>e</sup> |
| H6/H7                           | 8.3                       | 7.86 (+0.05) <sup>e</sup> |
| H2/H11                          | 8.0                       | 7.72 (+0.08) <sup>e</sup> |
| -CH <sub>2</sub>                | 4.3                       | 3.89                      |
| -CH <sub>3</sub>                | 1.2                       | 1.15                      |

<sup>a</sup> <sup>1</sup>H and <sup>13</sup>C solution NMR experiments (in CDCl<sub>3</sub>) were recorded in a 600 MHz spectrometer using TMS as an internal reference at 298 K.

<sup>b</sup> The experimental structure was fully optimised using conductor-like screening model (COSMO) at the DFT/PBE/TZ2P theory level in ADF2014 program. COSMO solvation model (CDCl<sub>3</sub>) provides more realistic geometries than those from vacuum optimisation. The chemical shifts in optimized geometry were calculated at SO-ZORA/PBE/TZ2P level of theory. The shielding references for TMS ( $\sigma_{TMS}$ : <sup>1</sup>H = 31.4 ppm and <sup>13</sup>C = 185.6 ppm) were calculated at the same level of theory.

<sup>c</sup>  $\Delta_{coord} = \delta_{expt}(\text{complex}) - \delta_{expt}(\text{PHEN})$  in ppm.

<sup>d</sup> For labels see Figure S1.

<sup>e</sup> versus  $\delta_{expt}(\text{PHEN})$  in ppm: C1/C12 = 150.6; C5/C9 = 146.6; C3/C10 = 136.2; C4/C8 = 128.9; C6/C7 = 126.8; C2/C11 = 123.3; H1/H12 = 9.21; H3/H10 = 8.27; H6/H7 = 7.81; H2/H11 = 7.64 (at 298K in CDCl<sub>3</sub> solution).

**Table S2.** Selected experimental X-ray crystallography (Expt.) and CASTEP calculated (3A/3B) bond lengths (Å) for the tris(*N,N*-diethyldithiocarbamato)(PHEN)lanthanum(III) complex.

| Bond      | Expt.     | CASTEP | Bond      | Expt.     | CASTEP |
|-----------|-----------|--------|-----------|-----------|--------|
| C11-N11   | 1.326(11) | 1.3498 | C21-N21   | 1.324(11) | 1.3481 |
| C12-N12   | 1.337(11) | 1.3541 | C22-N22   | 1.339(11) | 1.3561 |
| C31A-N31A | 1.339(9)  | 1.3570 | C32-N23   | 1.349(11) | 1.3544 |
| C31B-N31B | 1.365(2)  | 1.3574 |           |           |        |
| C11-S111  | 1.721(9)  | 1.7265 | C21-S211  | 1.700(9)  | 1.7213 |
| C11-S112  | 1.732(9)  | 1.7259 | C21-S212  | 1.741(9)  | 1.7258 |
| C12-S121  | 1.729(9)  | 1.7226 | C22-S221  | 1.722(10) | 1.7236 |
| C12-S122  | 1.719(9)  | 1.7256 | C22-S222  | 1.733(10) | 1.7238 |
| C31A-S131 | 1.693(9)  | 1.7236 | C32-S231  | 1.725(8)  | 1.7211 |
| C31A-S132 | 1.697(11) | 1.7162 | C32-S232  | 1.710(8)  | 1.7205 |
| C31B-S131 | 1.692(9)  | 1.7236 | N24-La1   | 2.709(7)  | 2.7360 |
| C31B-S133 | 1.789(9)  | 1.7125 | N25-La1   | 2.712(7)  | 2.7338 |
| N14-La1   | 2.701(7)  | 2.7080 |           |           |        |
| N15-La1   | 2.732(6)  | 2.7311 |           |           |        |
| N11-C111  | 1.483(11) | 1.4692 | N21-C211  | 1.506(15) | 1.4654 |
| N11-C113  | 1.471(12) | 1.4658 | N21-C213  | 1.459(12) | 1.4670 |
| N12-C121  | 1.457(12) | 1.4646 | N22-C221  | 1.474(13) | 1.4659 |
| N12-C123  | 1.475(11) | 1.4668 | N22-C223  | 1.472(13) | 1.4689 |
| N31A-C131 | 1.356(9)  | 1.4661 | N23-C231  | 1.482(11) | 1.4710 |
| N31A-C135 | 1.349(9)  | 1.4720 | N23-C233  | 1.489(14) | 1.4709 |
| N31B-C133 | 1.378(10) | 1.4683 |           |           |        |
| N31B-C137 | 1.379(10) | 1.4726 |           |           |        |
| S111-La1  | 2.946(2)  | 2.9819 | S211-La2  | 2.936(3)  | 2.9707 |
| S112-La1  | 2.926(2)  | 2.9465 | S212-La2  | 2.934(2)  | 2.9564 |
| S121-La1  | 2.927(2)  | 2.9379 | S221-La2  | 2.947(2)  | 2.9750 |
| S122-La1  | 2.988(2)  | 3.0296 | S222-La2  | 2.934(2)  | 2.9732 |
| S131-La1  | 2.973(3)  | 3.0199 | S231-La2  | 2.966(2)  | 3.0011 |
| S132-La1  | 3.012(4)  | 2.9913 | S232-La2  | 2.958(2)  | 2.9916 |
| S133-La1  | 2.961(5)  | 3.0015 |           |           |        |
| C111-C112 | 1.506(14) | 1.5178 | C211-C212 | 1.40(2)   | 1.5197 |
| C113-C114 | 1.499(15) | 1.5196 | C213-C214 | 1.498(16) | 1.5164 |
| C121-C122 | 1.516(15) | 1.5217 | C221-C222 | 1.531(18) | 1.5258 |
| C123-C124 | 1.514(15) | 1.5208 | C223-C224 | 1.503(17) | 1.5217 |
| C131-C132 | 1.44(3)   | 1.5222 | C231-C232 | 1.473(14) | 1.5231 |
| C135-C136 | 1.46(3)   | 1.5226 | C233-C234 | 1.484(17) | 1.5229 |
| C133-C134 | 1.59(3)   | 1.5193 |           |           |        |
| C137-C138 | 1.59(3)   | 1.5194 |           |           |        |

**Table S3.** Selected experimental X-ray crystallography (Expt.) and CASTEP calculated (3A/3B) bond angles (°) for the tris(*N,N*-diethyldithiocarbamato)(1,10-PHEN)lanthanum(III) complex.

| Bond           | Expt.     | CASTEP | Bond           | Expt.    | CASTEP |
|----------------|-----------|--------|----------------|----------|--------|
| S111-C11-S112  | 118.6(5)  | 119.28 | S211-C21-S212  | 118.0(5) | 119.95 |
| S121-C12-S122  | 118.7(5)  | 119.92 | S221-C22-S222  | 120.3(5) | 120.62 |
| S131-C31A-S132 | 117.3(5)  | 119.17 | S231-C32-S232  | 119.1(5) | 119.08 |
| S131-C31B-S133 | 113.1(5)  | 119.60 |                |          |        |
| N11-C11-S111   | 121.7(7)  | 121.07 | N21-C21-S211   | 120.2(7) | 120.08 |
| N11-C11-S112   | 119.7(7)  | 119.68 | N21-C21-S212   | 121.8(7) | 119.97 |
| N12-C12-S121   | 119.4(7)  | 119.45 | N22-C22-S221   | 120.3(7) | 119.49 |
| N12-C12-S122   | 121.9(7)  | 121.16 | N22-C22-S222   | 119.3(8) | 119.89 |
| N31A-C31A-S131 | 122.0(9)  | 119.80 | N23-C32-S231   | 120.5(6) | 120.44 |
| N31A-C31A-S132 | 116.1(9)  | 121.02 | N23-C32-S232   | 120.4(6) | 120.48 |
| N31B-C31B-S131 | 121.7(7)  | 119.70 | N14-La1-N15    | 60.1(19) | 60.41  |
| N31B-C31B-S133 | 120.0(4)  | 120.80 | N24-La2-N25    | 60.8(2)  | 61.01  |
| C11-S111-La1   | 86.1(3)   | 85.24  | C22-S221-La2   | 88.1(3)  | 88.60  |
| C11-S112-La1   | 86.5(3)   | 86.38  | C22-S222-La2   | 88.3(3)  | 88.66  |
| C12-S121-La1   | 91.4(3)   | 91.90  | C21-S211-La2   | 91.1(3)  | 89.39  |
| C12-S122-La1   | 89.6(3)   | 88.79  | C21-S212-La2   | 90.4(3)  | 89.78  |
| C31A-S131-La1  | 92.0(3)   | 90.06  | C32-S231-La2   | 89.5(3)  | 85.20  |
| C31A-S132-La1  | 90.5(4)   | 91.17  | C32-S232-La2   | 90.0(3)  | 105.49 |
| C31B-S133-La1  | 90.5(3)   | 90.60  |                |          |        |
| C11-N11-C111   | 122.4(8)  | 122.32 | C21-N21-C211   | 123.3(9) | 122.93 |
| C11-N11-C113   | 122.2(8)  | 122.75 | C21-N21-C213   | 122.6(8) | 121.80 |
| C111-N11-C113  | 115.4(8)  | 114.88 | C211-N21-C213  | 113.7(8) | 115.26 |
| C12-N12-C121   | 122.6(8)  | 123.20 | C22-N22-C221   | 121.9(9) | 121.20 |
| C12-N12-C123   | 122.8(8)  | 121.52 | C22-N22-C223   | 121.2(9) | 121.59 |
| C121-N12-C123  | 114.5(7)  | 115.16 | C221-N22-C223  | 116.8(8) | 117.14 |
| C31A-N31A-C131 | 132.5(15) | 121.53 | C32-N23-C231   | 120.9(7) | 121.39 |
| C31A-N31A-C135 | 126.1(14) | 121.85 | C32-N23-C233   | 122.4(8) | 121.22 |
| C131-N31A-C135 | 93.10(13) | 116.42 | C231-N23-C233  | 116.6(8) | 117.39 |
| N31A-C131-C132 | 106.7(17) | 113.86 | C31B-N31B-C133 | 119.0(7) | 121.06 |
| N31A-C135-C136 | 110.9(19) | 114.53 | C31B-N31B-C137 | 117.1(7) | 121.23 |
|                |           |        | C133-N31B-C137 | 120.1(7) | 117.78 |

**Table S4.** GIPAW/PBE calculated  $^{13}\text{C}$  and  $^{15}\text{N}$  nuclear shielding constants (in ppm) for geometry-optimised structures. A and B denote the two different configurations; 1A and 1B = all protons relaxed; 2A = all protons and C31A, N31A, S132, C131, C132, C135, C136 relaxed; 2B = all protons and C31B, N31B, S133, C133, C134, C137, C138 relaxed; 3A and 3B = all atoms relaxed.

| Atom Label | 1A    | 1B    | 2A    | 2B    | 3A    | 3B    |
|------------|-------|-------|-------|-------|-------|-------|
| C31        | -47.2 | -67.1 | -34.3 | -36.2 | -37.6 | -37.5 |
| C32        | -33.9 | -33.9 | -33.9 | -34.1 | -35.9 | -36.0 |
| C12        | -32.3 | -32.8 | -32.7 | -32.4 | -35.2 | -35.2 |
| C22        | -31.0 | -31.2 | -31.1 | -31.2 | -33.5 | -33.6 |
| C21        | -27.8 | -27.7 | -27.8 | -27.7 | -32.8 | -32.9 |
| C11        | -26.4 | -27.0 | -26.5 | -27.0 | -30.4 | -30.0 |
| C241       | 15.6  | 15.9  | 15.4  | 15.7  | 16.2  | 16.2  |
| C251       | 17.8  | 17.8  | 17.7  | 17.6  | 16.7  | 16.8  |
| C141       | 18.0  | 18.7  | 18.3  | 18.9  | 17.7  | 17.0  |
| C251       | 20.1  | 18.8  | 19.2  | 19.8  | 18.9  | 18.6  |
| C145       | 22.3  | 22.0  | 22.0  | 22.0  | 22.3  | 22.4  |
| C245       | 22.7  | 22.3  | 22.7  | 22.4  | 24.6  | 22.5  |
| C255       | 23.0  | 23.2  | 22.8  | 23.1  | 26.9  | 23.0  |
| C155       | 24.9  | 24.9  | 25.0  | 25.0  | 27.3  | 24.7  |
| C253       | 29.1  | 27.9  | 30.3  | 27.4  | 28.2  | 26.3  |
| C253       | 30.4  | 29.3  | 29.6  | 29.6  | 28.8  | 28.0  |
| C154       | 32.7  | 32.7  | 32.8  | 32.8  | 31.6  | 28.8  |
| C246       | 32.9  | 32.8  | 33.0  | 32.9  | 35.2  | 32.0  |
| C254       | 39.6  | 39.3  | 40.0  | 39.6  | 39.0  | 36.0  |
| C144       | 39.6  | 39.6  | 39.7  | 39.6  | 39.1  | 38.6  |
| C256       | 39.6  | 39.8  | 39.9  | 40.1  | 39.1  | 39.0  |
| C244       | 40.2  | 40.3  | 40.6  | 40.6  | 39.3  | 39.2  |
| C156       | 40.9  | 40.6  | 40.9  | 40.8  | 39.5  | 39.4  |
| C242       | 41.5  | 41.6  | 41.4  | 41.4  | 39.5  | 39.5  |
| C156       | 42.0  | 42.1  | 42.1  | 42.1  | 40.6  | 40.4  |
| C242       | 43.2  | 42.4  | 42.7  | 42.1  | 40.8  | 40.6  |
| C156       | 43.4  | 43.4  | 43.4  | 43.5  | 41.9  | 41.7  |
| C152       | 45.5  | 46.0  | 46.1  | 46.1  | 43.1  | 42.8  |
| C142       | 46.2  | 46.2  | 46.2  | 46.2  | 43.3  | 43.4  |
| C252       | 46.5  | 46.9  | 46.6  | 46.8  | 46.8  | 46.6  |
| C137       | 104.2 | 109.3 | 118.5 | 118.7 | 119.1 | 117.1 |
| C133       | 107.7 | 111.6 | 119.0 | 119.1 | 119.8 | 117.4 |
| C231       | 118.8 | 118.8 | 119.9 | 120.4 | 120.9 | 119.1 |
| C233       | 118.9 | 118.9 | 119.0 | 116.0 | 121.4 | 120.4 |
| C223       | 119.6 | 119.8 | 120.8 | 118.2 | 121.5 | 121.6 |
| C221       | 120.6 | 121.3 | 120.5 | 121.7 | 122.7 | 122.2 |
| C211       | 121.8 | 121.7 | 122.0 | 122.0 | 123.7 | 122.6 |
| C213       | 123.2 | 123.2 | 123.2 | 123.2 | 124.8 | 125.1 |
| C111       | 123.6 | 123.9 | 123.4 | 123.7 | 125.9 | 125.7 |
| C123       | 127.1 | 127.0 | 127.2 | 127.2 | 127.6 | 126.1 |
| C113       | 127.6 | 128.0 | 127.7 | 128.2 | 128.3 | 127.6 |
| C121       | 129.8 | 130.4 | 130.3 | 130.4 | 129.5 | 127.9 |
| C138       | 150.3 | 153.4 | 153.3 | 157.6 | 155.7 | 157.6 |
| C134       | 151.3 | 155.0 | 157.1 | 160.6 | 156.4 | 157.8 |

|      |       |       |       |       |       |       |
|------|-------|-------|-------|-------|-------|-------|
| C222 | 158.6 | 159.0 | 159.2 | 159.5 | 157.7 | 158.4 |
| C224 | 159.8 | 159.7 | 157.6 | 159.9 | 158.2 | 159.7 |
| C112 | 160.7 | 160.5 | 160.7 | 160.6 | 158.7 | 160.1 |
| C124 | 161.5 | 160.7 | 160.8 | 163.8 | 159.4 | 160.1 |
| C212 | 161.8 | 161.5 | 161.6 | 161.5 | 159.4 | 160.2 |
| C232 | 161.8 | 161.7 | 161.7 | 161.7 | 160.0 | 160.8 |
| C122 | 162.3 | 162.4 | 162.6 | 162.5 | 160.8 | 161.1 |
| C232 | 162.5 | 162.5 | 161.8 | 162.5 | 161.1 | 161.4 |
| C234 | 162.7 | 162.6 | 162.7 | 162.6 | 161.5 | 162.8 |
| C114 | 164.8 | 164.8 | 164.6 | 164.7 | 161.6 | 163.2 |
| N24  | -70.5 | -69.6 | -70.8 | -69.5 | -72.0 | -72.2 |
| N25  | -68.9 | -65.0 | -68.4 | -68.7 | -72.0 | -72.3 |
| N14  | -64.4 | -64.4 | -64.9 | -66.1 | -66.7 | -67.0 |
| N15  | -62.0 | -62.5 | -62.5 | -62.4 | -61.5 | -60.8 |
| N11  | 44.2  | 45.0  | 44.7  | 45.6  | 44.0  | 44.0  |
| N12  | 40.4  | 40.4  | 40.8  | 40.8  | 45.2  | 45.2  |
| N21  | 47.8  | 49.1  | 49.4  | 48.9  | 47.0  | 47.5  |
| N22  | 48.3  | 48.9  | 47.5  | 48.2  | 47.4  | 47.2  |
| N23  | 45.0  | 44.9  | 44.2  | 44.7  | 48.8  | 48.8  |
| N31  | 76.1  | 43.3  | 54.7  | 53.3  | 53.6  | 53.4  |

## Notes 1. Topological analysis of the electron density

QTAIM Bond concepts:

A chemical bond exists between two neighbouring atoms if there is a minimum in the density along the line connecting the local maxima, also called the *bond path*, of the electron density ( $\rho$ ) that corresponds to the atomic positions. The hypothetical point along the *bond path* at the interatomic surface where the shared electron density ( $\rho$ ) reaches a minimum is called as a *bond critical point* (BCrP). The critical points that are found within ring structures are known as *ring critical points* (RCrPs). The value of electron density ( $\rho$ ) at the BCrP measures the amount of  $\rho$  that built up in the bonding region. Therefore, high value of a BCrP may indicate predominantly covalent bond whereas the predominantly ionic bonds may have low values of BCrP and BCrP= 0 for a pure ionic bond.

## Notes 2. Natural Bond Orbital (NBO) Analysis

The NBO search program (see Table S5) yielded the best Lewis structure (of lowest overall non-Lewis (NL) occupancy, 7.84e) with 89 core (CR), 85 bond (BD), and 14 lone pair (LP) “Lewis-type” (L) NBOs, which described about 97.98% of the total electron density. The residual 2.02% “delocalisation error” (corresponding to 7.84e) is primarily associated with valence-NL orbitals of BD\* (valence antibond) orbitals.

**Table S5.** Output of Natural Bond Orbital (NBO) search program (25 cycles) for the best Lewis-like structure of the title lanthanum(III) complex.

| Cycle No. | Occ. Thresh. | Occupancies |                | Lewis Structure |    |    |    | Low | High |
|-----------|--------------|-------------|----------------|-----------------|----|----|----|-----|------|
|           |              | Lewis (L)   | non-Lewis (NL) | CR              | BD | nC | LP |     |      |
| 25        | 1.79         | 380.16      | 7.84           | 89              | 85 | 6  | 14 | 8   | 9    |

At cycle 25, the best Lewis structure (ground-state) of the title complex, with a strong delocalisation of the electron density, was accepted.

| Orbital Type | L/NL      | Electron contributions | % Electron Contribution |
|--------------|-----------|------------------------|-------------------------|
| Core         | Lewis     | 177.95                 | 99.98                   |
| Valence      | Lewis     | 202.21                 | 96.29                   |
| Total        | Lewis     | 380.16                 | 97.98                   |
| Valence      | non-Lewis | 7.16                   | 1.84                    |
| Rydberg      | non-Lewis | 0.68                   | 0.18                    |
| Total        | non-Lewis | 7.84                   | 2.02                    |

NBOs: “CR” for a core, “LP” for a 1-center valence lone pair, “BD” for a 2-center bond, and “nC” for a n-center bond.

**Table S6.** Second order perturbation theory analysis of Fock matrix in NBO basis (only NBOs with E(2) > 0.5 kcal/mol are shown for some selected donor LPs (S211, N24) and BDs (La-S, S-C, and S-N)).

| Donor (L)            | Acceptor (NL)         | Occupancy       | E(2) kcal/mol |
|----------------------|-----------------------|-----------------|---------------|
| 92. LP(1) S211       | 241. BD*(1) C211-N21  | 1.92841/0.04112 | 0.61          |
| 92. LP(1) S211       | 280. BD*(1) C21-S212  | 1.92841/0.05310 | 6.28          |
| 92. LP(1) S211       | 281. BD*(1) S211-La   | 1.92841/0.08680 | 8.30          |
| 92. LP(1) S211       | 282. BD*(1) S212-La   | 1.92841/0.10211 | 1.73          |
| 92. LP(1) S211       | 283. BD*(1) S221-La   | 1.92841/0.09310 | 1.66          |
| 92. LP(1) S211       | 284. BD*(1) S222-La   | 1.92841/0.08908 | 0.63          |
| 92. LP (1) S211      | 285. BD*(1) S231-La   | 1.92841/0.09112 | 0.62          |
| 93. LP (2) S211      | 278. BD*(2) C21-N21   | 1.59572/0.58512 | 58.06         |
| 93. LP (2) S211      | 279. BD*(1) C21-S211  | 1.59572/0.04718 | 1.33          |
| 93. LP (2) S211      | 281. BD*(1) S211-La   | 1.59572/0.08680 | 0.81          |
| 93. LP (2) S211      | 284. BD*(1) S222-La   | 1.59572/0.08908 | 3.06          |
| 93. LP (2) S211      | 286. BD*(1) S232-La   | 1.59572/0.08256 | 1.15          |
| 94. LP (1) S212      | 279. BD*(1) C21-S211  | 1.93709/0.04748 | 5.43          |
| 94. LP (1) S212      | 281. BD*(1) S211-La   | 1.93709/0.08680 | 1.95          |
| 94. LP (1) S212      | 282. BD*(1) S212-La   | 1.93709/0.10211 | 5.20          |
| 94. LP (1) S212      | 283. BD*(1) S221-La   | 1.93709/0.09310 | 2.03          |
| 94. LP (1) S212      | 285. BD*(1) S231-La   | 1.93709/0.09112 | 3.83          |
| 95. LP (2) S212      | 278. BD*(2) C21-N21   | 1.66904/0.58512 | 47.91         |
| 95. LP (2) S212      | 283. BD*(1) S221-La   | 1.66904/0.09310 | 1.31          |
| 95. LP (2) S212      | 285. BD*(1) S231-La   | 1.66904/0.09112 | 1.74          |
| 178. BD (1) C213-N21 | 277. BD*(1) C21-N21   | 1.97056/0.08150 | 1.27          |
| 178. BD (1) C213-N21 | 279. BD*(1) C21-S211  | 1.97056/0.04748 | 4.43          |
| 179. BD (1) C21-N21  | 241. BD*(1) C211N21   | 1.99002/0.04112 | 1.44          |
| 179. BD (1) C21-N21  | 276. BD*(1) C213-N21  | 1.99002/0.05427 | 1.02          |
| 179. BD (1) C21-N21  | 279. BD*(1) C21-S211  | 1.99002/0.04748 | 0.56          |
| 179. BD (1) C21-N21  | 280. BD*(1) C21-S212  | 1.99002/0.05310 | 0.52          |
| 179. BD (1) C21-N21  | 281. BD*(1) S211-La   | 1.99002/0.08680 | 1.91          |
| 179. BD (1) C21-N21  | 282. BD*(1) S212-La   | 1.99002/0.10211 | 1.81          |
| 180. BD (2) C21-N21  | 240. BD*(1) C211-C212 | 1.95076/0.01465 | 3.48          |
| 180. BD (2) C21-N21  | 275. BD*(1) C213-C17  | 1.95076/0.00921 | 1.84          |
| 180. BD (2) C21-N21  | 278. BD*(2) C21-N21   | 1.95076/0.58512 | 1.71          |
| 181. BD (1) C21-S211 | 276. BD*(1) C213-N21  | 1.97107/0.05427 | 7.22          |
| 181. BD (1) C21-S211 | 277. BD*(1) C21-N21   | 1.97107/0.08150 | 0.86          |
| 181. BD (1) C21-S211 | 283. BD*(1) S221-La   | 1.97107/0.09310 | 0.88          |
| 181. BD (1) C21-S211 | 284. BD*(1) S222-La   | 1.97107/0.08908 | 0.79          |
| 181. BD (1) C21-S211 | 285. BD*(1) S231-La   | 1.97107/0.09112 | 0.73          |
| 181. BD (1) C21-S211 | 286. BD*(1) S232-La   | 1.97107/0.08256 | 0.55          |
| 182. BD (1) C21-S212 | 241. BD*(1) C211N21   | 1.97077/0.04112 | 7.26          |
| 182. BD (1) C21-S212 | 277. BD*(1) C21-N21   | 1.97077/0.08150 | 0.76          |
| 182. BD (1) C21-S212 | 284. BD*(1) S222-La   | 1.97077/0.08908 | 0.74          |
| 183. BD (1) S211-La  | 277. BD*(1) C21-N21   | 1.93632/0.08150 | 9.91          |
| 183. BD (1) S211-La  | 280. BD*(1) C21-S212  | 1.93632/0.05310 | 0.67          |
| 183. BD (1) S211-La  | 281. BD*(1) S211-La   | 1.93632/0.08680 | 4.12          |
| 183. BD (1) S211-La  | 282. BD*(1) S212-La   | 1.93632/0.10211 | 6.64          |
| 183. BD (1) S211-La  | 283. BD*(1) S221-La   | 1.93632/0.09310 | 6.50          |
| 183. BD (1) S211-La  | 284. BD*(1) S222-La   | 1.93632/0.08908 | 6.73          |



|                       |                     |                 |       |
|-----------------------|---------------------|-----------------|-------|
| 183. BD (1) S211-La   | 285. BD*(1) S231-La | 1.93632/0.09112 | 5.72  |
| 183. BD (1) S211-La   | 286. BD*(1) S232-La | 1.93632/0.08256 | 4.04  |
| 184. BD (1) S212-La   | 277. BD*(1) C21-N21 | 1.93305/0.08150 | 10.27 |
| 184. BD (1) S212-La   | 281. BD*(1) S211-La | 1.93305/0.08680 | 1.17  |
| 184. BD (1) S212-La   | 284. BD*(1) S222-La | 1.93305/0.08908 | 2.08  |
| 184. BD (1) S212-La   | 285. BD*(1) S231-La | 1.93305/0.09112 | 0.53  |
| 184. BD (1) S212-La   | 286. BD*(1) S232-La | 1.93305/0.08256 | 1.38  |
| 90. LP (1) N24        | 281. BD*(1) S211-La | 1.84608/0.08680 | 14.50 |
| 90. LP (1) N24        | 283. BD*(1) S221-La | 1.84608/0.09310 | 16.09 |
| 90. LP (1) N24        | 284. BD*(1) S222-La | 1.84608/0.08908 | 0.99  |
| 90. LP (1) N24        | 285. BD*(1) S231-La | 1.84608/0.09112 | 9.26  |
| 152. BD (1) C241-C242 | 281. BD*(1) S211-La | 1.98348/0.08680 | 0.70  |
| 152. BD (1) C241-C242 | 283. BD*(1) S221-La | 1.98348/0.09310 | 1.01  |
| 153. BD (1) C241-N24  | 281. BD*(1) S211-La | 1.98286/0.08680 | 0.71  |
| 153. BD (1) C241-N24  | 283. BD*(1) S221-La | 1.98286/0.09310 | 1.21  |
| 156. BD (1) C244-C245 | 281. BD*(1) S211-La | 1.97217/0.08680 | 0.65  |
| 158. BD (1) C244-C246 | 281. BD*(1) S211-La | 1.97891/0.08680 | 1.36  |
| 159. BD (1) C245-N24  | 281. BD*(1) S211-La | 1.97891/0.08680 | 2.95  |
| 159. BD (1) C245-N24  | 283. BD*(1) S221-La | 1.97891/0.09310 | 2.11  |
| 159. BD (1) C245-N24  | 285. BD*(1) S231-La | 1.97891/0.09112 | 0.85  |
| 162. BD (1) C253-C254 | 281. BD*(1) S211-La | 1.98345/0.08680 | 0.76  |
| 162. BD (1) C253-C254 | 282. BD*(1) S212-La | 1.98345/0.10211 | 0.91  |
| 166. BD (1) C246-C256 | 281. BD*(1) S211-La | 1.97207/0.08680 | 0.74  |

“LP” for a 1-center valence lone pair, “BD” for a 2-center bonding, BD\* for a 2-center anti-bond NBOs, the numbers in parenthesis denote the bond order between the pair of atoms.

**Table S7.** Natural Population Analysis (NPA) of some selected atoms (La, S, and N).

| Atom No. | Natural Charge | Core     | Valence | Rydberg | Total    |
|----------|----------------|----------|---------|---------|----------|
| La1      | 1.06292        | 53.98388 | 1.80251 | 0.15069 | 55.93708 |
| S221     | -0.21591       | 9.99904  | 6.19620 | 0.02067 | 16.21591 |
| S222     | -0.23656       | 9.99908  | 6.21595 | 0.02152 | 16.23656 |
| S231     | -0.20352       | 9.99907  | 6.18442 | 0.02003 | 16.20352 |
| S232     | -0.18377       | 9.99906  | 6.16265 | 0.02205 | 16.18377 |
| S211     | -0.27274       | 9.99905  | 6.25214 | 0.02155 | 16.27274 |
| S212     | -0.18413       | 9.99907  | 6.16256 | 0.02249 | 16.18413 |
| N22      | -0.38560       | 1.99924  | 5.37634 | 0.01001 | 7.38560  |
| N23      | -0.39221       | 1.99923  | 5.38287 | 0.01011 | 7.39221  |
| N11      | -0.38837       | 1.99924  | 5.37912 | 0.01000 | 7.38837  |
| N24      | -0.50004       | 1.99946  | 5.48992 | 0.01066 | 7.50004  |
| N25      | -0.49423       | 1.99947  | 5.48231 | 0.01245 | 7.49423  |

**Table S8.** Cartesian coordinates (in Å) of CASTEP/PBE optimised 3B structure of the title complex (used for NBO and AIM analysis).

| Atom | X         | Y         | Z         | Atom | X         | Y         | Z         |
|------|-----------|-----------|-----------|------|-----------|-----------|-----------|
| 1 La | 4.871073  | 9.913694  | 5.033163  | 40 H | 7.297494  | 12.311427 | 10.152013 |
| 2 S  | 2.741222  | 11.951052 | 5.108915  | 41 H | 6.243690  | 12.882157 | 8.850036  |
| 3 S  | 2.092825  | 9.231028  | 4.068611  | 42 H | 8.181433  | 14.097935 | 7.807958  |
| 4 S  | 5.964840  | 12.284682 | 6.408408  | 43 H | 9.249478  | 13.526153 | 9.110467  |
| 5 S  | 7.618018  | 9.819233  | 6.151880  | 44 H | 7.897174  | 14.627665 | 9.477519  |
| 6 S  | 6.300450  | 8.483984  | 2.818437  | 45 H | 9.380871  | 11.204798 | 9.406556  |
| 7 S  | 5.661101  | 11.365725 | 2.527847  | 46 H | 9.155056  | 10.006682 | 8.116643  |
| 8 N  | 0.362311  | 11.272150 | 4.115801  | 47 H | 8.807086  | 8.966254  | 10.379092 |
| 9 N  | 7.646172  | 11.431716 | 8.295645  | 48 H | 7.318968  | 8.918126  | 9.424120  |
| 10 N | 7.029462  | 9.952820  | 0.715120  | 49 H | 7.502020  | 10.121088 | 10.722194 |
| 11 N | 4.523915  | 7.286688  | 5.647340  | 50 H | -1.614882 | 10.634092 | 3.960039  |
| 12 N | 4.494968  | 9.169113  | 7.656986  | 51 H | -0.394410 | 9.361607  | 3.798955  |
| 13 C | 1.620561  | 10.858040 | 4.392376  | 52 H | -1.455299 | 9.885530  | 1.577487  |
| 14 C | -0.639678 | 10.390953 | 3.513510  | 53 H | 0.290986  | 10.249798 | 1.560101  |
| 15 C | -0.675464 | 10.530564 | 1.998470  | 54 H | -0.899583 | 11.564873 | 1.703267  |
| 16 C | -0.091187 | 12.634795 | 4.413842  | 55 H | -0.816708 | 12.912168 | 3.634678  |
| 17 C | -0.726691 | 12.738481 | 5.792280  | 56 H | 0.764906  | 13.314429 | 4.327623  |
| 18 C | 7.138406  | 11.202773 | 7.066404  | 57 H | -1.616317 | 12.101001 | 5.874951  |
| 19 C | 7.275442  | 12.606767 | 9.094323  | 58 H | -1.017693 | 13.775985 | 5.999312  |
| 20 C | 8.210289  | 13.779374 | 8.856600  | 59 H | -0.009398 | 12.437554 | 6.565412  |
| 21 C | 8.642897  | 10.554135 | 8.916208  | 60 H | 4.460355  | 6.756047  | 3.657208  |
| 22 C | 8.030093  | 9.590221  | 9.918725  | 61 H | 4.228615  | 4.298782  | 4.091319  |
| 23 C | 6.386066  | 9.942410  | 1.910299  | 62 H | 4.178596  | 3.489783  | 6.446018  |
| 24 C | 7.202379  | 11.199373 | -0.041335 | 63 H | 4.167337  | 4.027274  | 8.870793  |
| 25 C | 6.016803  | 11.582407 | -0.916475 | 64 H | 4.449058  | 11.117967 | 8.340883  |
| 26 C | 7.615667  | 8.723401  | 0.155230  | 65 H | 4.390279  | 10.510185 | 10.759803 |
| 27 C | 6.613669  | 7.804161  | -0.522636 | 66 H | 4.327940  | 8.078445  | 11.396866 |
| 28 C | 4.424912  | 6.371654  | 4.677288  | 67 H | 4.228333  | 5.716040  | 10.682810 |
| 29 C | 4.301211  | 5.000539  | 4.920511  | 68 H | 8.101962  | 11.070143 | -0.657464 |
| 30 C | 4.280706  | 4.553278  | 6.223020  | 69 H | 7.400282  | 11.999773 | 0.686026  |
| 31 C | 4.354395  | 5.484772  | 7.276630  | 70 H | 5.757870  | 10.771928 | -1.608888 |
| 32 C | 4.466640  | 6.862042  | 6.941688  | 71 H | 6.263596  | 12.477451 | -1.506702 |
| 33 C | 4.282924  | 5.088203  | 8.644779  | 72 H | 5.137510  | 11.803520 | -0.299283 |
| 34 C | 4.314925  | 6.017454  | 9.638957  | 73 H | 8.110648  | 8.189773  | 0.979454  |
| 35 C | 4.404971  | 7.410478  | 9.340739  | 74 H | 8.388420  | 9.036494  | -0.559004 |
| 36 C | 4.472706  | 7.845414  | 7.991750  | 75 H | 7.127687  | 6.918912  | -0.920733 |
| 37 C | 4.385981  | 8.392900  | 10.351594 | 76 H | 6.114235  | 8.292808  | -1.366730 |
| 38 C | 4.403114  | 9.724502  | 10.003170 | 77 H | 5.856069  | 7.468465  | 0.193194  |
| 39 C | 4.444701  | 10.069654 | 8.645843  |      |           |           |           |

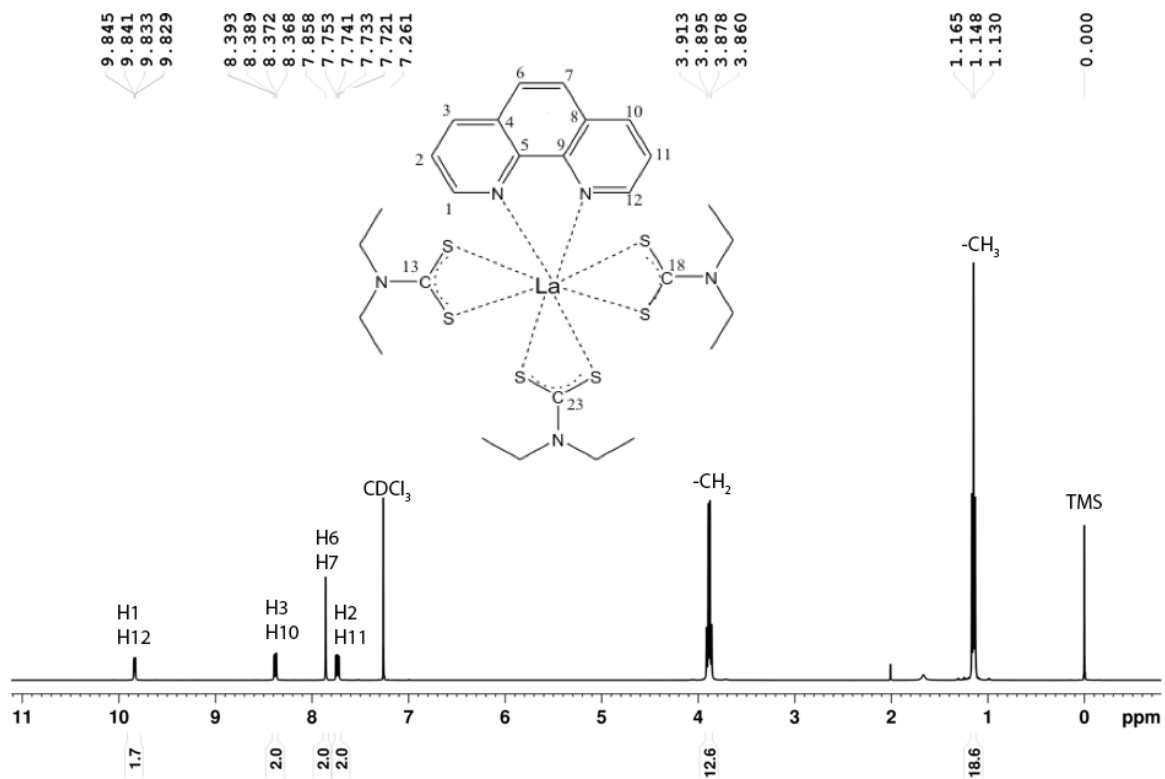

**Figure S1.** <sup>1</sup>H NMR (600 MHz, CDCl<sub>3</sub>) spectrum for the tris(*N,N*-diethyldithio-carbamato)(1,10-PHEN)lanthanum(III) complex. (32 transients, 2s relaxation delay, 32k time domain (TD) points, internal reference = TMS).

a)

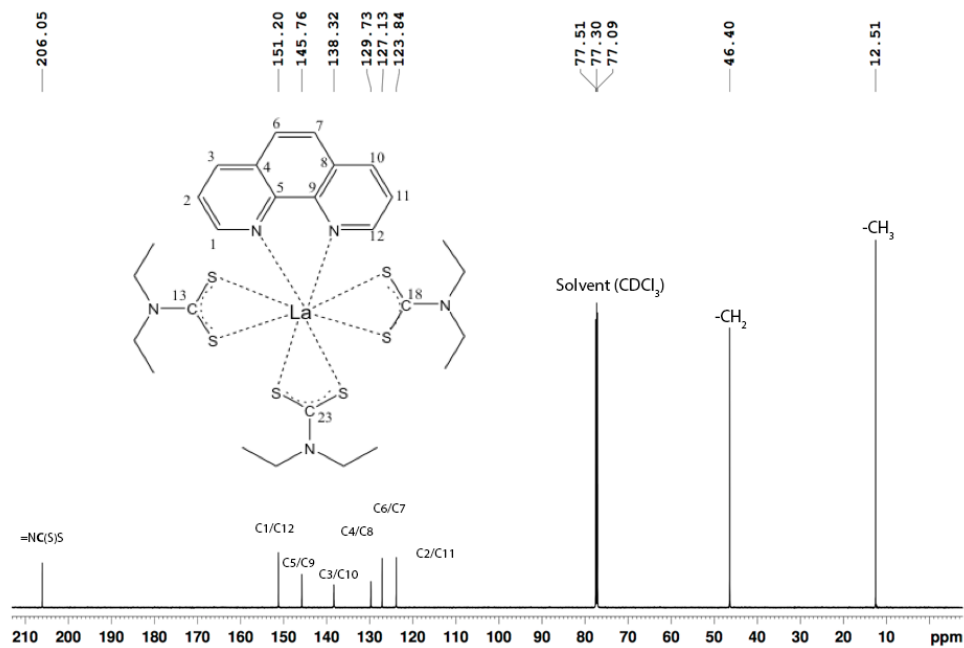

b)

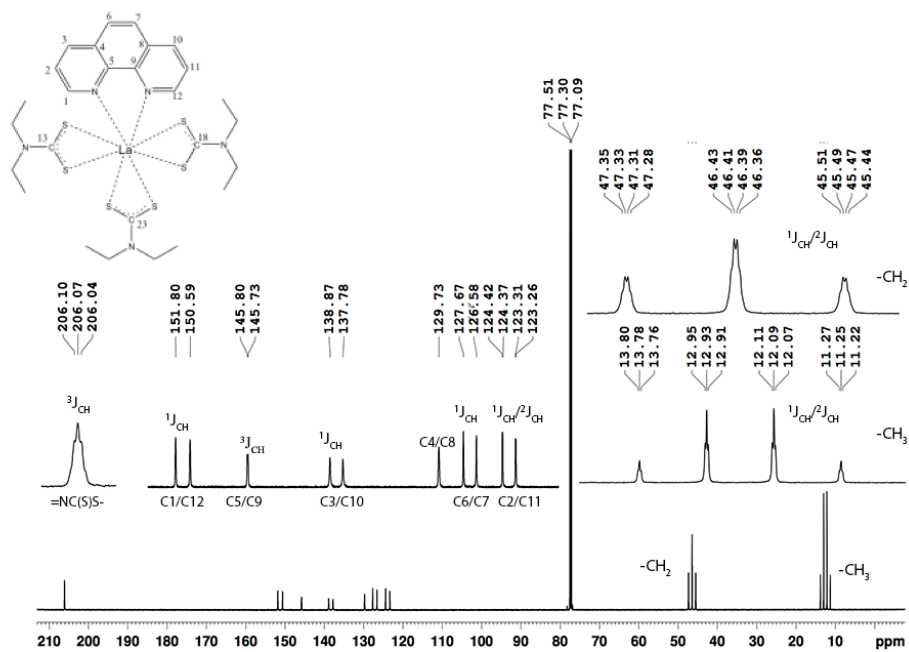

**Figure S2.**  $^1\text{H}$  (a) decoupled and (b) coupled  $^{13}\text{C}$  NMR (150.8 MHz,  $\text{CDCl}_3$ ) spectra for the tris(*N,N*-diethyldithiocarbamato)(1,10-PHEN)lanthanum(III) complex (internal reference = TMS).

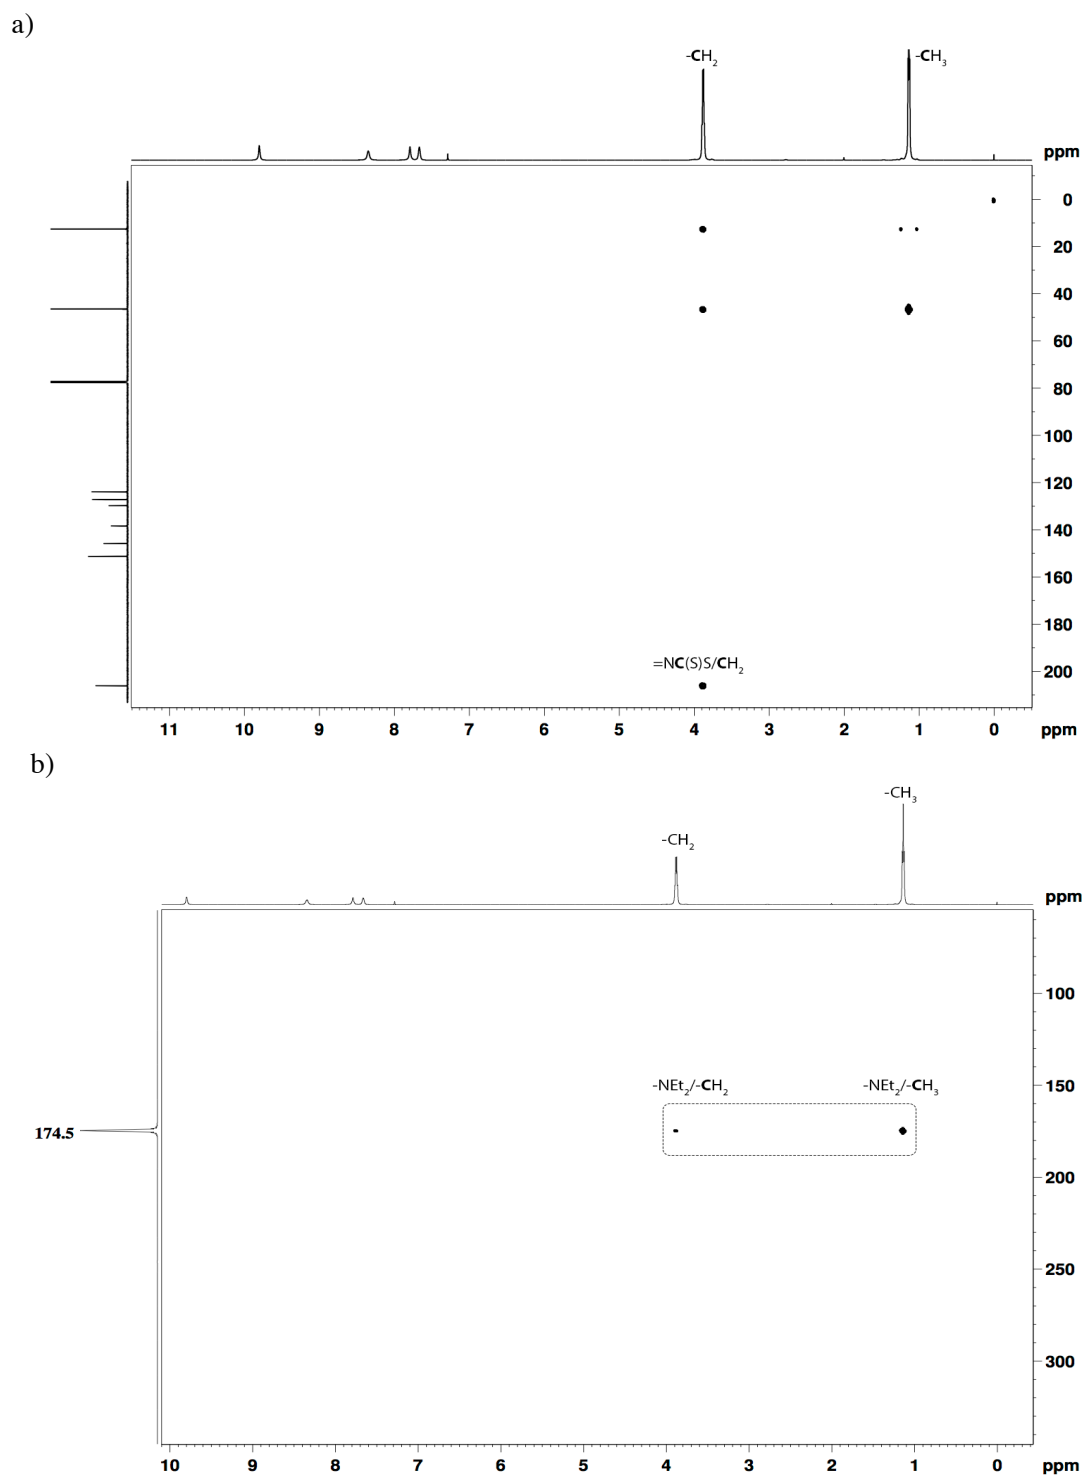

**Figure S3.** (a)  $^1\text{H}$ - $^{13}\text{C}$  and (b)  $^1\text{H}$ - $^{15}\text{N}$  HMBC NMR spectra (600 MHz,  $\text{CDCl}_3$ ) of the tris(*N,N*-diethyldithiocarbamato)(1,10-PHEN)lanthanum(III) complex.

a)

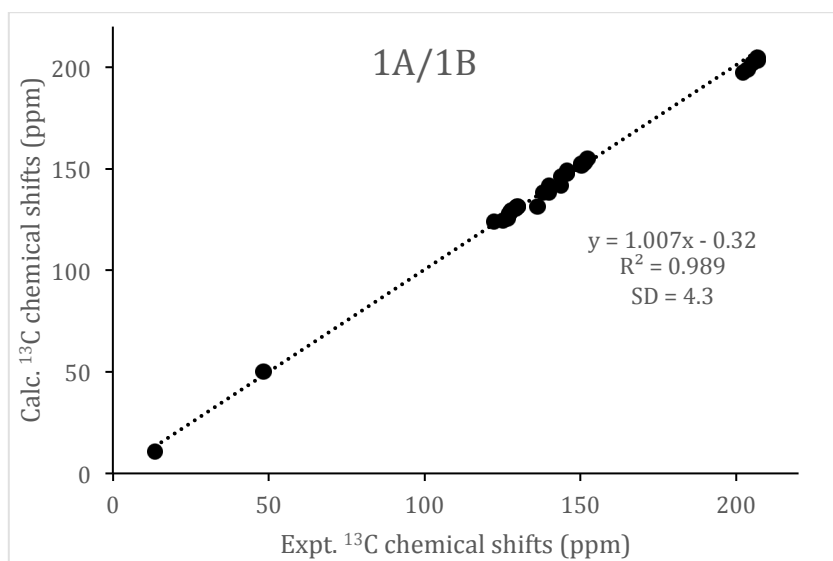

b)

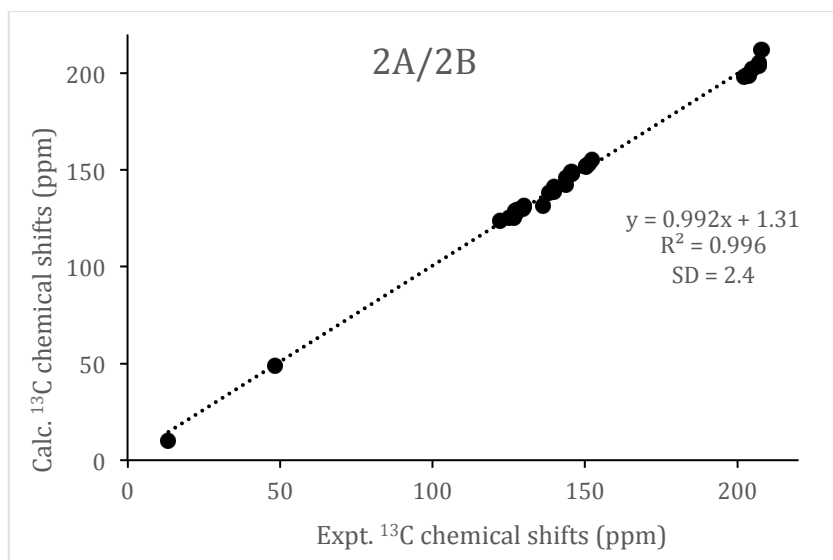

c)

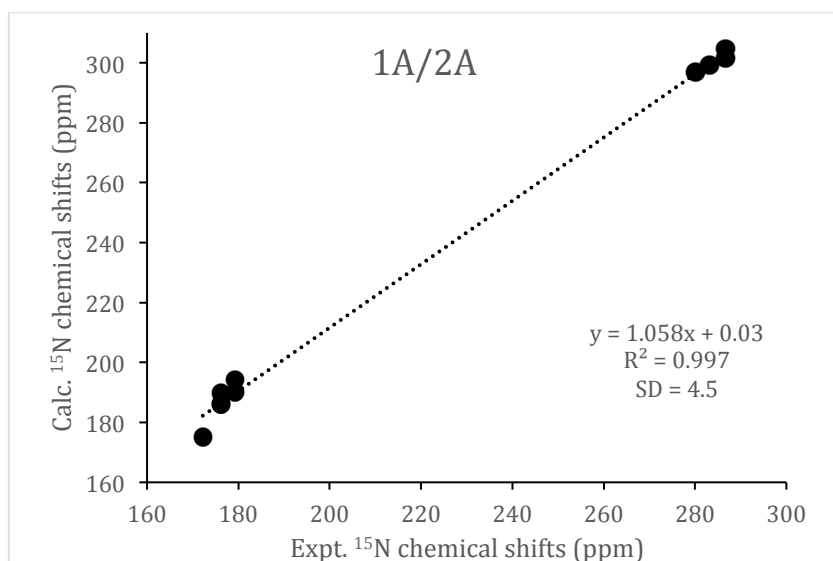

d)

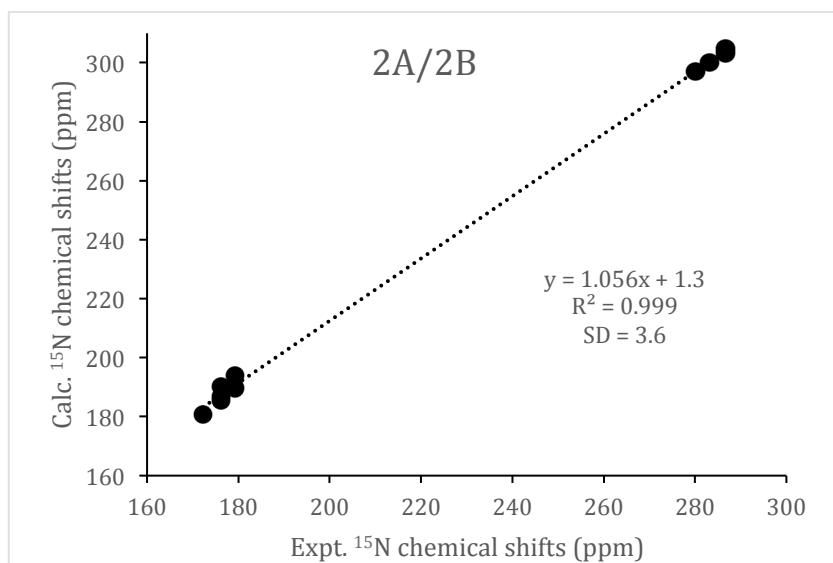

**Figure S4.** Experimental vs. computed chemical shift plots for the geometry-optimised structures of the title lanthanum complex. The GIPAW/PBE calculated  $^{13}\text{C}$  (a) and (b), and  $^{15}\text{N}$  (c) and (d) chemical shifts for the structures 1A/2A and 1B/2B, respectively. A and B denote the two different configurations; 1A and 1B = all protons relaxed; 2A = all protons and C31A, N31A, S132, C131, C132, C135, C136 relaxed; 2B = all protons and C31B, N31B, S133, C133, C134, C137, C138 relaxed. The standard deviation (SD) between the experimental and calculated chemical shift is also shown.



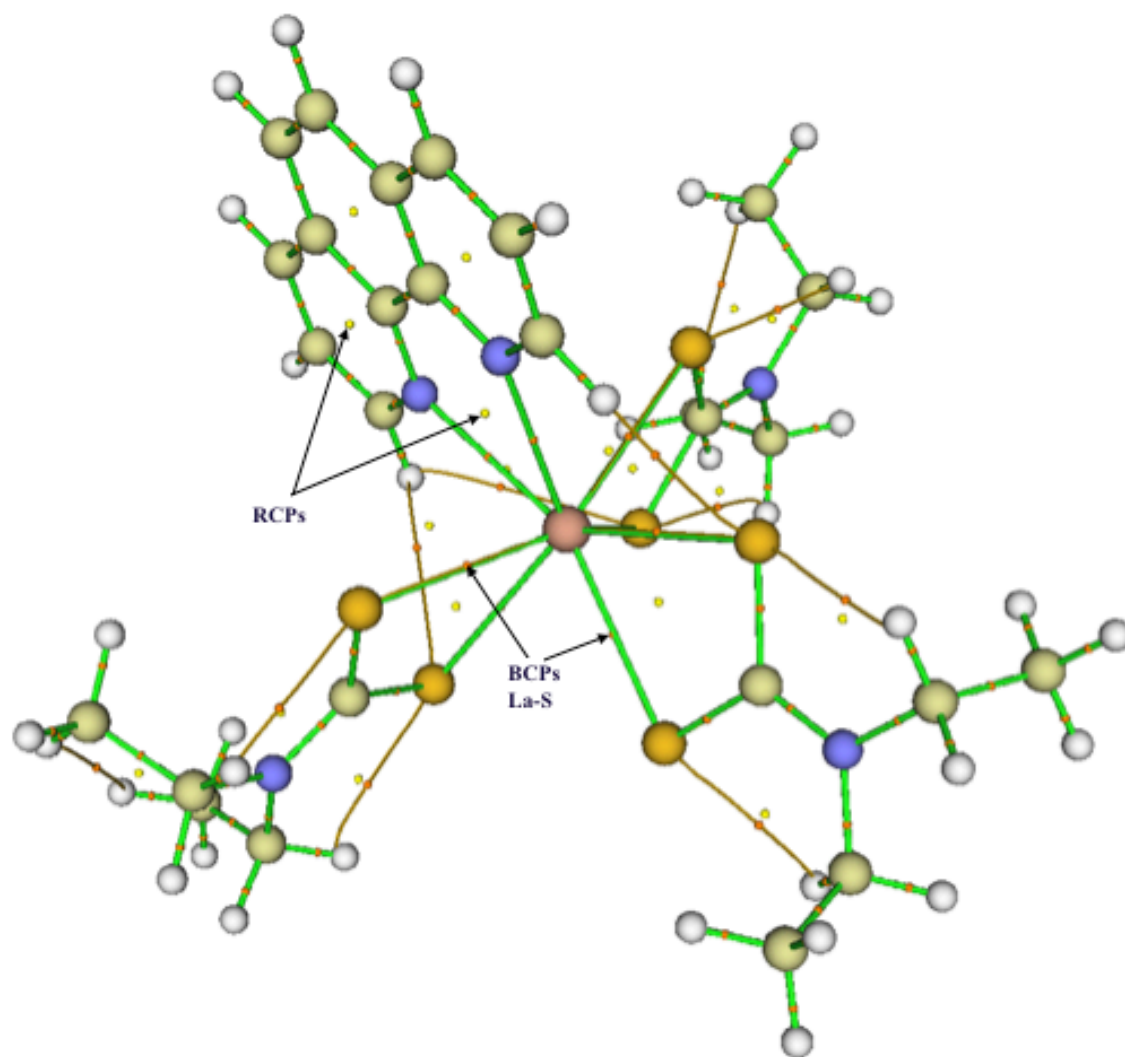

**Figure S5.** A molecular graph for the title lanthanum(III) complex. Nuclear critical points (NCrPs) are in grey (H), yellow-brown (C), blue (N), silver-brown (S), and red-brown (La); bond critical points (BCrPs) in orange; ring critical points (RCrPs) in yellow.

a)

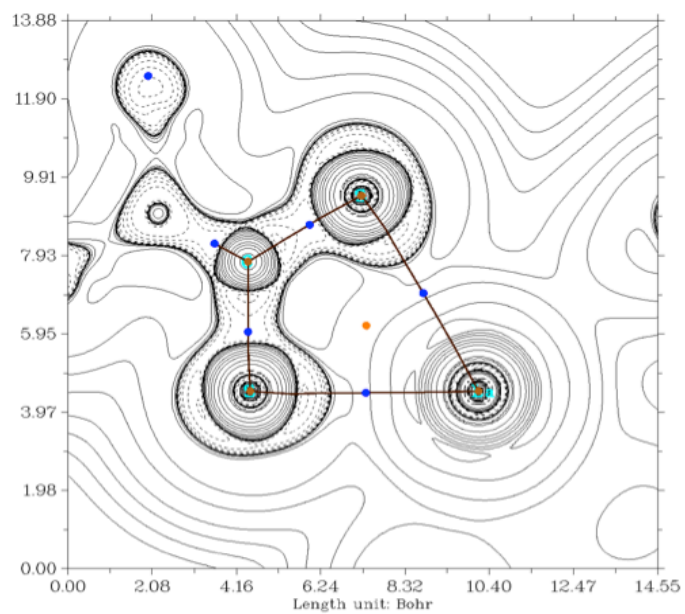

b)

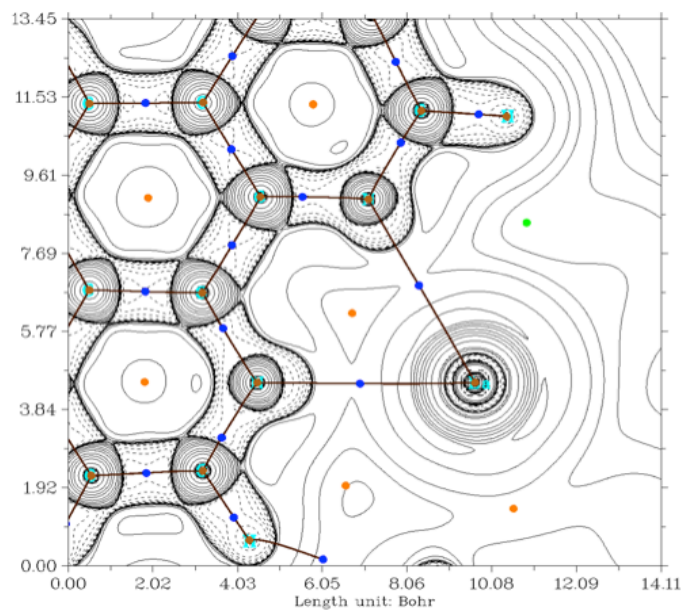

**Figure S6.** Contour plot representations of the Laplacian of the electron density ( $\nabla_{\rho}^2$ ) in the plane spanned by the atoms of **(a)** La-Dtc (plane S-La-S) and **(b)** La-PHEN (plane N-La-N) groups, showing bond paths (BPs, brown line), bond critical points (BCrPs, blue), and ring critical points (RCrPs, orange). Black (solid) and dash lines depict negative, while solid-grey lines depict positive values, respectively.

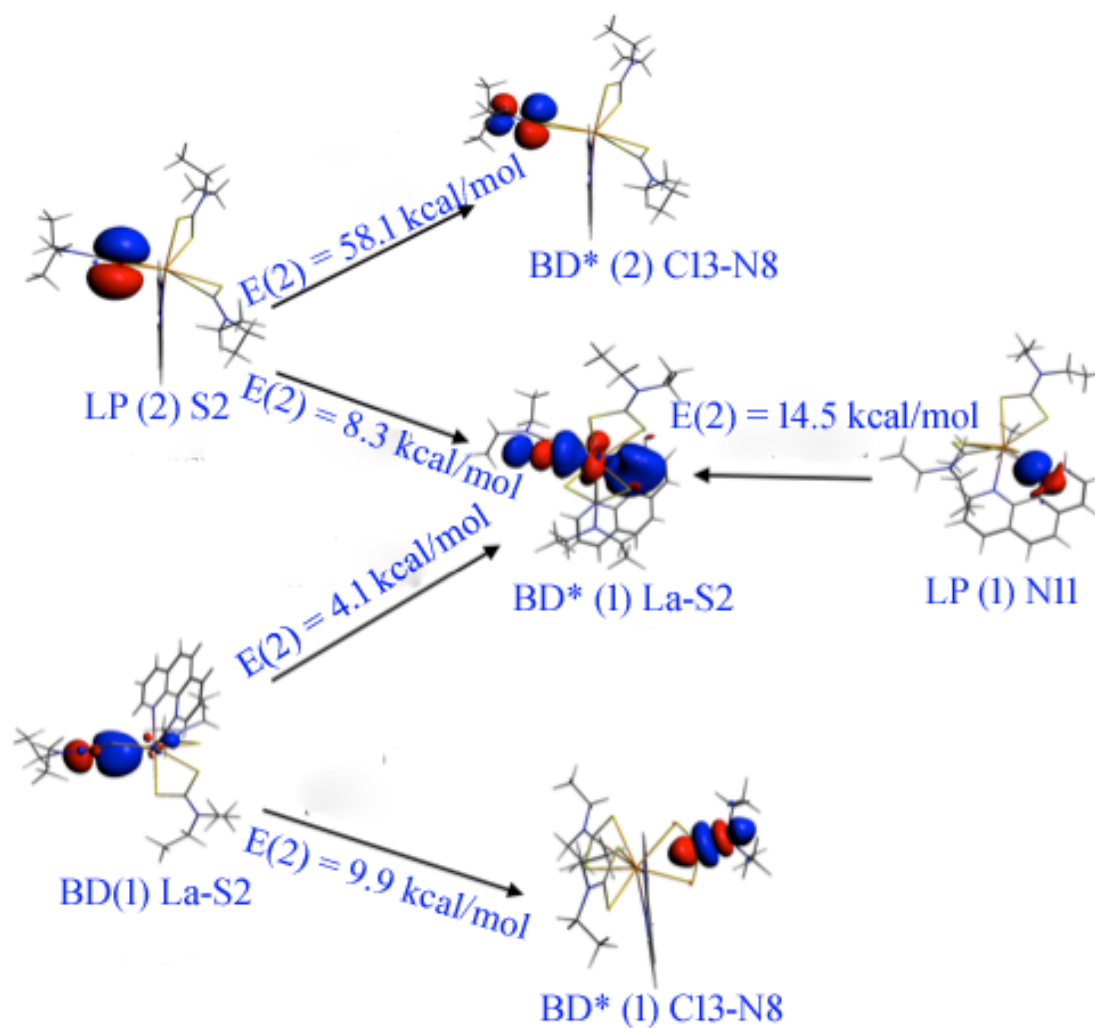

**Figure S7.** Visualisation of some selected donor-acceptor NBOs. The stabilisation energy,  $E(2)$  in kcal/mol, associated with the donor-acceptor interaction (estimated via the second-order perturbation theory) is also shown. LP = lone pair, BD = 2-center bond, and BD\* = anti-bonding NBOs.

**HOMO-LUMO analysis (Figure S8):**

The LUMO and LUMO+1 orbitals are concentrated on the PHEN ligand. The greater contributions of the LUMO orbitals come from 3-center NL ( $3C_n$  and  $3C^*$ ) NBOs of the PHEN 'C' and 'N' atoms. On the other hand, the HOMO and HOMO-1 levels show greater contributions of LPs of S atoms and La-S bonding NBOs.

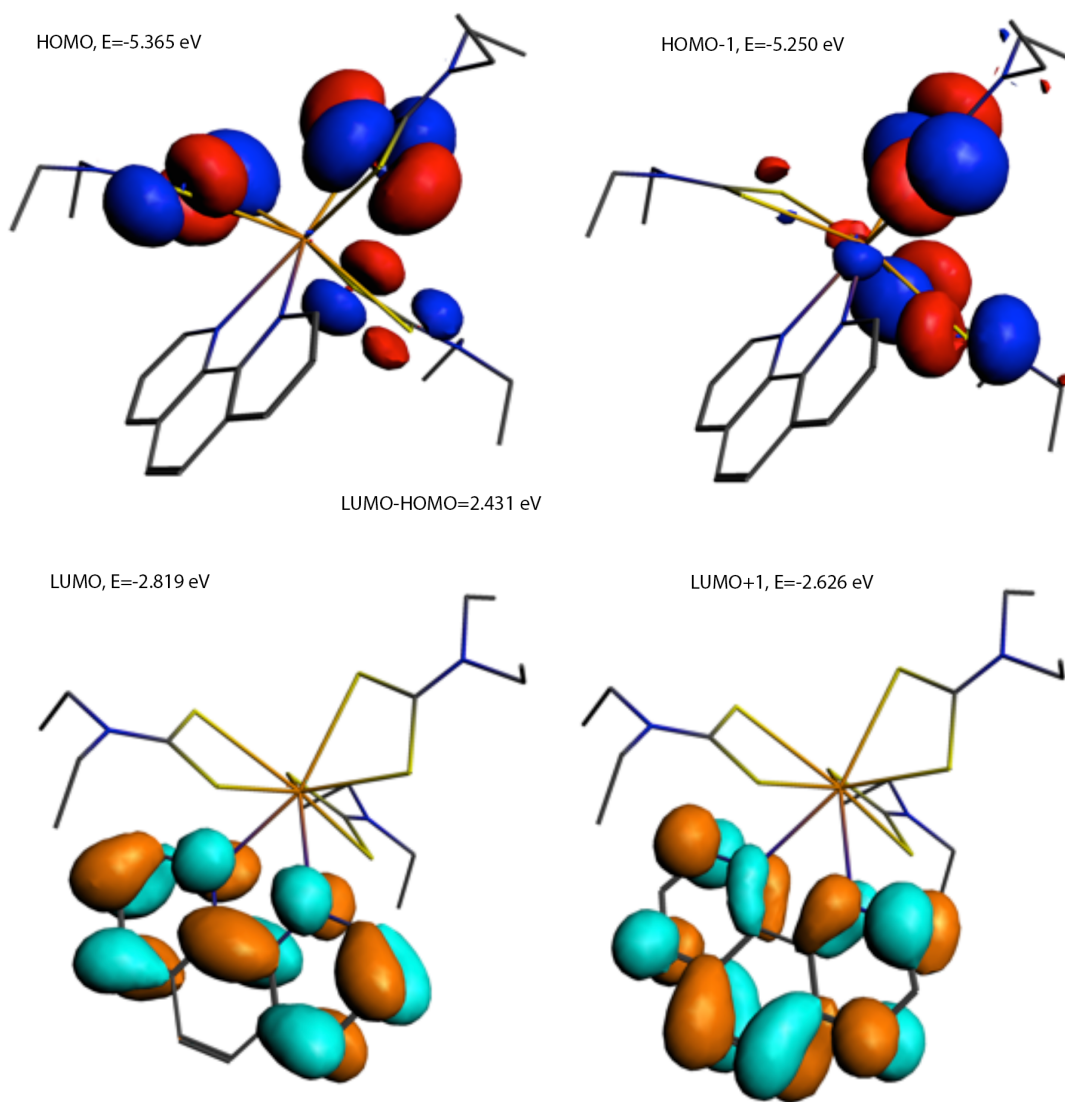

**Figure S8.** Plots of the frontier orbitals of the tris(*N,N*-diethyldithiocarbamato)(PHEN)-lanthanum(III) complex by B3LYP/TZ2P theory. Orbital plots were prepared with the 'advview' tool of the ADF graphical user interface. HOMO-LUMO gap is 2.431 eV.
